# Supplementary material for: Mechanical Ventilation and Death During Pregnancy Complicated by COVID-19: A Prognostic Analysis from the Brazilian COVID-19 Registry Score
Source: Research Square preprint supplement (doi:10.21203/rs.3.rs-956336/v2), 2022-03-07
Supplement: Supplementary file 1 [file 9c63c288e080fd459d27659c.docx]

**Supplementary file**

**Table S1** Clinical characteristics of pregnant women compared to the general group of ABC2-SPH patients

| | Label | Overall | | Gestante | | Control patients | | P-value² | | --- | --- | --- | --- | --- | --- | --- | --- | | Characteristic | N = 4,027*1* | Non missing cases | N = 85*1* | Non missing cases | N = 3,942*1* | Non missing cases | | **Age (years)** | 60.0 (47.0, 72.0) | 4,027 (100%) | 30.0 (26.0, 37.0) | 85 (100%) | 60.0 (48.0, 72.0) | 3,942 (100%) | <0.001 | | **Sex at birth** |  | 4,025 (100%) |  | 85 (100%) |  | 3,940 (100%) | <0.001 | | Male | 2,138 (53.1%) |  |  |  | 2,138 (54.3%) |  |  | | Female | 1,887 (46.9%) |  | 85 (100.0%) |  | 1,802 (45.7%) |  |  | | **Comorbidities** |  |  |  |  |  |  |  | | Hypertension | 2,151 (53.4%) | 4,027 (100%) | 8 (9.4%) | 85 (100%) | 2,143 (54.4%) | 3,942 (100%) | <0.001 | | Coronary artery disease | 215 (5.3%) | 4,027 (100%) | 0 (0.0%) | 85 (100%) | 215 (5.5%) | 3,942 (100%) | 0.014 | | Heart failure | 269 (6.7%) | 4,027 (100%) | 0 (0.0%) | 85 (100%) | 269 (6.8%) | 3,942 (100%) | 0.023 | | Atrial fibrillation/flutter | 139 (3.5%) | 4,027 (100%) | 0 (0.0%) | 85 (100%) | 139 (3.5%) | 3,942 (100%) | 0.121 | | Stroke | 146 (3.6%) | 4,027 (100%) | 0 (0.0%) | 85 (100%) | 146 (3.7%) | 3,942 (100%) | 0.075 | | COPD | 253 (6.3%) | 4,027 (100%) | 0 (0.0%) | 85 (100%) | 253 (6.4%) | 3,942 (100%) | 0.029 | | Diabetes mellitus | 1,161 (28.8%) | 4,027 (100%) | 16 (18.8%) | 85 (100%) | 1,145 (29.0%) | 3,942 (100%) | 0.053 | | Obesity (BMI ≥ 30kg/m2) | 703 (17.5%) | 4,027 (100%) | 15 (17.6%) | 85 (100%) | 688 (17.5%) | 3,942 (100%) | >0.999 | | Cirrhosis | 25 (0.6%) | 4,027 (100%) | 0 (0.0%) | 85 (100%) | 25 (0.6%) | 3,942 (100%) | >0.999 | | Cancer | 194 (4.8%) | 4,027 (100%) | 0 (0.0%) | 85 (100%) | 194 (4.9%) | 3,942 (100%) | 0.034 | | **Number of Comorbidities*** |  | 4,027 (100%) |  | 85 (100%) |  | 3,942 (100%) |  | | 0 | 1,221 (30.3%) |  | 55 (64.7%) |  | 1,166 (29.6%) |  |  | | 1 | 1,187 (29.5%) |  | 23 (27.1%) |  | 1,164 (29.5%) |  |  | | 2 | 1,015 (25.2%) |  | 5 (5.9%) |  | 1,010 (25.6%) |  |  | | 3 | 430 (10.7%) |  | 2 (2.4%) |  | 428 (10.9%) |  |  | | 4 | 131 (3.3%) |  |  |  | 131 (3.3%) |  |  | | 5 | 34 (0.8%) |  |  |  | 34 (0.9%) |  |  | | 6 | 8 (0.2%) |  |  |  | 8 (0.2%) |  |  | | 7 | 1 (0.0%) |  |  |  | 1 (0.0%) |  |  | | **Clinical presentation upon hospital admission** | |  |  |  |  |  |  | | SF ratio | 428.6 (332.1, 452.4) | 3,882 (96%) | 457.1 (442.9, 466.7) | 71 (84%) | 428.6 (332.1, 452.4) | 3,811 (97%) | <0.001 | | Respiratory rate (irpm) | 20.0 (18.0, 24.0) | 3,274 (81%) | 22.0 (19.0, 25.0) | 65 (76%) | 20.0 (18.0, 24.0) | 3,209 (81%) | 0.096 | | Heart rate (bpm) | 88.0 (78.0, 100.0) | 3,833 (95%) | 100.0 (92.0, 112.0) | 81 (95%) | 88.0 (78.0, 100.0) | 3,752 (95%) | <0.001 | | Glasgow coma score |  | 3,744 (93%) |  | 85 (100%) |  | 3,659 (93%) | 0.615 | | 3 | 30 (0.8%) |  |  |  | 30 (0.8%) |  |  | | 4 | 3 (0.1%) |  |  |  | 3 (0.1%) |  |  | | 5 | 3 (0.1%) |  |  |  | 3 (0.1%) |  |  | | 6 | 3 (0.1%) |  |  |  | 3 (0.1%) |  |  | | 7 | 3 (0.1%) |  |  |  | 3 (0.1%) |  |  | | 8 | 5 (0.1%) |  |  |  | 5 (0.1%) |  |  | | 9 | 2 (0.1%) |  |  |  | 2 (0.1%) |  |  | | 10 | 10 (0.3%) |  |  |  | 10 (0.3%) |  |  | | 11 | 15 (0.4%) |  |  |  | 15 (0.4%) |  |  | | 12 | 10 (0.3%) |  |  |  | 10 (0.3%) |  |  | | 13 | 33 (0.9%) |  |  |  | 33 (0.9%) |  |  | | 14 | 162 (4.3%) |  |  |  | 162 (4.4%) |  |  | | 15 | 3,465 (92.5%) |  | 85 (100.0%) |  | 3,380 (92.4%) |  |  | | Systolic blood pressure |  | 3,825 (95%) |  | 84 (99%) |  | 3,741 (95%) | 0.426 | | ≥ 90 (mm Hg) | 3,587 (93.8%) |  | 80 (95.2%) |  | 3,507 (93.7%) |  |  | | < 90 (mm Hg) | 60 (1.6%) |  | 2 (2.4%) |  | 58 (1.6%) |  |  | | Inotrope requirement | 178 (4.7%) |  | 2 (2.4%) |  | 176 (4.7%) |  |  | | Diastolic blood pressure |  | 3,811 (95%) |  | 84 (99%) |  | 3,727 (95%) | 0.397 | | > 60 (mm Hg) | 3,112 (81.7%) |  | 67 (79.8%) |  | 3,045 (81.7%) |  |  | | ≤ 60 (mm Hg) | 521 (13.7%) |  | 15 (17.9%) |  | 506 (13.6%) |  |  | | Inotrope requirement | 178 (4.7%) |  | 2 (2.4%) |  | 176 (4.7%) |  |  | | **Laboratory exams** |  |  |  |  |  |  |  | | Hemoglobin (g/L) | 13.3 (12.1, 14.4) | 3,917 (97%) | 11.8 (10.8, 12.5) | 82 (96%) | 13.3 (12.1, 14.5) | 3,835 (97%) | <0.001 | | Platelet count (109/L) | 196,000.0 (154,475.0, 257,000.0) | 3,870 (96%) | 201,000.0 (167,000.0, 243,000.0) | 81 (95%) | 196,000.0 (154,000.0, 257,000.0) | 3,789 (96%) | 0.723 | | NL ratio | 4.7 (2.8, 7.8) | 3,805 (94%) | 4.9 (3.4, 7.1) | 82 (96%) | 4.7 (2.8, 7.8) | 3,723 (94%) | 0.752 | | Lactate value | 1.4 (1.1, 1.9) | 2,763 (69%) | 1.1 (0.8, 1.5) | 34 (40%) | 1.4 (1.1, 1.9) | 2,729 (69%) | 0.002 | | C reactive protein (mg/L) | 76.8 (38.0, 142.6) | 3,522 (87%) | 47.0 (19.0, 100.0) | 61 (72%) | 77.1 (38.3, 143.0) | 3,461 (88%) | 0.002 | | Blood urea nitrogen (mg/dL) | 35.0 (24.9, 51.7) | 3,670 (91%) | 15.0 (11.2, 19.5) | 62 (73%) | 35.0 (25.0, 52.0) | 3,608 (92%) | <0.001 | | Creatinine (mg/dL) | 0.9 (0.8, 1.2) | 3,807 (95%) | 0.6 (0.5, 0.7) | 72 (85%) | 0.9 (0.8, 1.2) | 3,735 (95%) | <0.001 | | Sodium (mmol/L) | 137.0 (135.0, 140.0) | 3,578 (89%) | 136.0 (135.0, 138.0) | 52 (61%) | 137.0 (135.0, 140.0) | 3,526 (89%) | 0.045 | | HCO3- | 23.0 (21.0, 25.0) | 3,246 (81%) | 18.8 (17.2, 20.0) | 42 (49%) | 23.0 (21.0, 25.0) | 3,204 (81%) | <0.001 | | pH | 7.4 (7.4, 7.5) | 3,257 (81%) | 7.4 (7.4, 7.5) | 43 (51%) | 7.4 (7.4, 7.5) | 3,214 (82%) | 0.367 | | Arterial pO2 | 75.1 (63.2, 96.0) | 3,208 (80%) | 85.3 (72.3, 105.6) | 43 (51%) | 75.0 (63.0, 95.7) | 3,165 (80%) | 0.014 | | Arterial pCO2 | 35.0 (31.2, 39.0) | 3,219 (80%) | 29.0 (26.2, 30.9) | 43 (51%) | 35.0 (31.4, 39.0) | 3,176 (81%) | <0.001 |   *1Statistics presented: Median (IQR); n (%)*  *2Statistical tests performed: Wilcoxon rank-sum test; chi-square test of independence; Fisher's exact test*  *BMI: body mass index; COPD: chronic obstructive pulmonary disease; HCO3-: bicarbonate; NL ratio: neutrophils-to-lymphocytes ratio; pH: hydrogen potential;*  *pCO2: carbon dioxide partial pressure; pO2: oxygen partial pressure; SF ratio: SpO2/FiO2 ratio.* |
| --- | --- | --- | --- | --- | --- | --- | --- | --- | --- | --- | --- | --- | --- | --- | --- | --- | --- | --- | --- | --- | --- | --- | --- | --- | --- | --- | --- | --- | --- | --- | --- | --- | --- | --- | --- | --- | --- | --- | --- | --- | --- | --- | --- | --- | --- | --- | --- | --- | --- | --- | --- | --- | --- | --- | --- | --- | --- | --- | --- | --- | --- | --- | --- | --- | --- | --- | --- | --- | --- | --- | --- | --- | --- | --- | --- | --- | --- | --- | --- | --- | --- | --- | --- | --- | --- | --- | --- | --- | --- | --- | --- | --- | --- | --- | --- | --- | --- | --- | --- | --- | --- | --- | --- | --- | --- | --- | --- | --- | --- | --- | --- | --- | --- | --- | --- | --- | --- | --- | --- | --- | --- | --- | --- | --- | --- | --- | --- | --- | --- | --- | --- | --- | --- | --- | --- | --- | --- | --- | --- | --- | --- | --- | --- | --- | --- | --- | --- | --- | --- | --- | --- | --- | --- | --- | --- | --- | --- | --- | --- | --- | --- | --- | --- | --- | --- | --- | --- | --- | --- | --- | --- | --- | --- | --- | --- | --- | --- | --- | --- | --- | --- | --- | --- | --- | --- | --- | --- | --- | --- | --- | --- | --- | --- | --- | --- | --- | --- | --- | --- | --- | --- | --- | --- | --- | --- | --- | --- | --- | --- | --- | --- | --- | --- | --- | --- | --- | --- | --- | --- | --- | --- | --- | --- | --- | --- | --- | --- | --- | --- | --- | --- | --- | --- | --- | --- | --- | --- | --- | --- | --- | --- | --- | --- | --- | --- | --- | --- | --- | --- | --- | --- | --- | --- | --- | --- | --- | --- | --- | --- | --- | --- | --- | --- | --- | --- | --- | --- | --- | --- | --- | --- | --- | --- | --- | --- | --- | --- | --- | --- | --- | --- | --- | --- | --- | --- | --- | --- | --- | --- | --- | --- | --- | --- | --- | --- | --- | --- | --- | --- | --- | --- | --- | --- | --- | --- | --- | --- | --- | --- | --- | --- | --- | --- | --- | --- | --- | --- | --- | --- | --- | --- | --- | --- | --- | --- | --- | --- | --- | --- | --- | --- | --- | --- | --- | --- | --- | --- | --- | --- | --- | --- | --- | --- | --- | --- | --- | --- | --- | --- | --- | --- | --- | --- | --- | --- | --- | --- | --- | --- | --- | --- | --- | --- | --- | --- | --- | --- | --- | --- | --- | --- | --- | --- | --- | --- | --- | --- | --- | --- | --- | --- | --- | --- | --- | --- | --- | --- | --- | --- | --- | --- | --- | --- | --- | --- | --- | --- | --- | --- | --- | --- | --- | --- | --- | --- | --- | --- | --- | --- | --- | --- | --- | --- | --- | --- | --- | --- | --- | --- | --- | --- | --- | --- | --- | --- | --- | --- | --- | --- | --- | --- | --- | --- | --- | --- | --- | --- | --- | --- | --- | --- | --- | --- | --- | --- | --- | --- | --- | --- | --- | --- | --- | --- | --- | --- | --- | --- | --- | --- | --- | --- | --- | --- | --- | --- | --- | --- | --- | --- | --- | --- | --- | --- | --- | --- | --- | --- | --- | --- | --- | --- | --- | --- | --- | --- | --- | --- | --- | --- | --- | --- | --- | --- | --- | --- | --- | --- | --- | --- | --- | --- | --- | --- | --- | --- | --- | --- | --- | --- | --- | --- | --- | --- | --- | --- | --- | --- | --- | --- |

**Table S2** Clinical outcomes of pregnant women compared to the general group of ABC2-SPH patients

| Label | Overall | | Gestante | | Control patients | | P-value² |
| --- | --- | --- | --- | --- | --- | --- | --- |
| Characteristic | N = 4,027*1* | Non missing cases | N = 85*1* | Non missing cases | N = 3,942*1* | Non missing cases |
| Days hospitalized | 7.0 (4.0, 14.0) | 4,026 (100%) | 6.0 (3.0, 11.0) | 85 (100%) | 7.0 (4.0, 14.0) | 3,941 (100%) | 0.010 |
| ICU | 1,446 (35.9%) | 4,026 (100%) | 27 (31.8%) | 85 (100%) | 1,419 (36.0%) | 3,941 (100%) | 0.489 |
| Days between hospitalization and ICU | 1.0 (0.0, 3.0) | 1,445 (36%) | 2.0 (0.0, 4.0) | 27 (32%) | 1.0 (0.0, 3.0) | 1,418 (36%) | 0.048 |
| Days in the ICU | 9.0 (4.0, 18.0) | 1,442 (36%) | 6.0 (2.5, 13.0) | 27 (32%) | 9.0 (4.0, 18.0) | 1,415 (36%) | 0.088 |
| VTE | 177 (4.4%) | 4,027 (100%) | 0 (0.0%) | 85 (100%) | 177 (4.5%) | 3,942 (100%) | 0.053 |
| Need for mechanical ventilation | 1,132 (28.6%) | 3,964 (98%) | 14 (17.3%) | 81 (95%) | 1,118 (28.8%) | 3,883 (99%) | 0.032 |
| Need for dialysis | 414 (10.3%) | 4,024 (100%) | 3 (3.5%) | 85 (100%) | 411 (10.4%) | 3,939 (100%) | 0.058 |
| Sepsis | 558 (13.9%) | 4,027 (100%) | 5 (5.9%) | 85 (100%) | 553 (14.0%) | 3,942 (100%) | 0.046 |
| Disseminated intravascular coagulation | 15 (0.4%) | 4,027 (100%) | 1 (1.2%) | 85 (100%) | 14 (0.4%) | 3,942 (100%) | 0.274 |
| Acute heart failure (new or chronic decompensated) | 110 (2.7%) | 4,027 (100%) | 0 (0.0%) | 85 (100%) | 110 (2.8%) | 3,942 (100%) | 0.174 |
| Nosocomial infection | 479 (11.9%) | 4,027 (100%) | 6 (7.1%) | 85 (100%) | 473 (12.0%) | 3,942 (100%) | 0.221 |
| Acute heart failure | 37 (0.9%) | 4,027 (100%) | 0 (0.0%) | 85 (100%) | 37 (0.9%) | 3,942 (100%) | >0.999 |
| Myocarditis | 8 (0.2%) | 4,027 (100%) | 0 (0.0%) | 85 (100%) | 8 (0.2%) | 3,942 (100%) | >0.999 |
| Bleeding | 70 (1.7%) | 4,027 (100%) | 4 (4.7%) | 85 (100%) | 66 (1.7%) | 3,942 (100%) | 0.059 |
| Hyperglycemia | 481 (11.9%) | 4,027 (100%) | 3 (3.5%) | 85 (100%) | 478 (12.1%) | 3,942 (100%) | 0.025 |
| Adult Respiratory Distress Syndrome | 936 (23.2%) | 4,027 (100%) | 12 (14.1%) | 85 (100%) | 924 (23.4%) | 3,942 (100%) | 0.060 |
| Vascular thrombosis | 191 (4.7%) | 4,027 (100%) | 1 (1.2%) | 85 (100%) | 190 (4.8%) | 3,942 (100%) | 0.189 |
| Arterial thrombosis | 14 (0.3%) | 4,027 (100%) | 1 (1.2%) | 85 (100%) | 13 (0.3%) | 3,942 (100%) | 0.259 |
| In hospital mortality | 809 (20.1%) | 4,027 (100%) | 3 (3.5%) | 85 (100%) | 806 (20.4%) | 3,942 (100%) | <0.001 |

*1Statistics presented: Median (IQR); n (%)*

*2Statistical tests performed: Wilcoxon rank-sum test; chi-square test of independence; Fisher's exact test*

*ICU: intensive care unit; VTE: venous thromboembolism; IC: cardiac insufficiency.*

**Table S3** Characteristics of pregnant women included and not included in the study

| Label | Overall | | Gestante | | Control patients | | P-value² |
| --- | --- | --- | --- | --- | --- | --- | --- |
| Characteristic | N = 85*1* | Non missing cases | N = 42*1* | Non missing cases | N = 43*1* | Non missing cases |
| **Age (years)** | 30.0 (26.0, 37.0) | 85 (100%) | 32.5 (29.0, 37.8) | 42 (100%) | 28.0 (24.5, 36.0) | 43 (100%) | 0.016 |
| **Sex at birth** |  | 85 (100%) |  | 42 (100%) |  | 43 (100%) |  |
| Female | 85 (100.0%) |  | 42 (100.0%) |  | 43 (100.0%) |  |  |
| **Comorbidities** |  |  |  |  |  |  |  |
| Hypertension | 8 (9.4%) | 85 (100%) | 4 (9.5%) | 42 (100%) | 4 (9.3%) | 43 (100%) | >0.999 |
| Coronary artery disease | 0 (0.0%) | 85 (100%) | 0 (0.0%) | 42 (100%) | 0 (0.0%) | 43 (100%) |  |
| Heart failure | 0 (0.0%) | 85 (100%) | 0 (0.0%) | 42 (100%) | 0 (0.0%) | 43 (100%) |  |
| Atrial fibrillation/flutter | 0 (0.0%) | 85 (100%) | 0 (0.0%) | 42 (100%) | 0 (0.0%) | 43 (100%) |  |
| Stroke | 0 (0.0%) | 85 (100%) | 0 (0.0%) | 42 (100%) | 0 (0.0%) | 43 (100%) |  |
| COPD | 0 (0.0%) | 85 (100%) | 0 (0.0%) | 42 (100%) | 0 (0.0%) | 43 (100%) |  |
| Diabetes mellitus | 16 (18.8%) | 85 (100%) | 6 (14.3%) | 42 (100%) | 10 (23.3%) | 43 (100%) | 0.435 |
| Obesity (BMI &gt; 30kg/m2) | 15 (17.6%) | 85 (100%) | 9 (21.4%) | 42 (100%) | 6 (14.0%) | 43 (100%) | 0.536 |
| Cirrhosis | 0 (0.0%) | 85 (100%) | 0 (0.0%) | 42 (100%) | 0 (0.0%) | 43 (100%) |  |
| Cancer | 0 (0.0%) | 85 (100%) | 0 (0.0%) | 42 (100%) | 0 (0.0%) | 43 (100%) |  |
| **Number of Comorbidities*** |  | 85 (100%) |  | 42 (100%) |  | 43 (100%) | 0.878 |
| 0 | 55 (64.7%) |  | 28 (66.7%) |  | 27 (62.8%) |  |  |
| 1 | 23 (27.1%) |  | 10 (23.8%) |  | 13 (30.2%) |  |  |
| 2 | 5 (5.9%) |  | 3 (7.1%) |  | 2 (4.7%) |  |  |
| 3 | 2 (2.4%) |  | 1 (2.4%) |  | 1 (2.3%) |  |  |
| **Clinical presentation upon hospital admission** | | |  |  |  |  |  |
| SF ratio | 457.1 (442.9, 466.7) | 71 (84%) | 457.1 (447.6, 463.1) | 40 (95%) | 457.1 (388.7, 466.7) | 31 (72%) | 0.616 |
| Respiratory rate (irpm) | 22.0 (19.0, 25.0) | 65 (76%) | 20.5 (18.8, 24.2) | 32 (76%) | 22.0 (19.0, 25.0) | 33 (77%) | 0.257 |
| Heart rate (bpm) | 100.0 (92.0, 112.0) | 81 (95%) | 100.0 (91.5, 112.2) | 40 (95%) | 100.0 (92.0, 110.0) | 41 (95%) | 0.865 |
| Glasgow coma score |  | 85 (100%) |  | 42 (100%) |  | 43 (100%) |  |
| 15 | 85 (100.0%) |  | 42 (100.0%) |  | 43 (100.0%) |  |  |
| Systolic blood pressure |  | 84 (99%) |  | 41 (98%) |  | 43 (100%) | 0.744 |
| ≥ 90 (mm Hg) | 80 (95.2%) |  | 40 (97.6%) |  | 40 (93.0%) |  |  |
| < 90 (mm Hg) | 2 (2.4%) |  | 1 (2.4%) |  | 1 (2.3%) |  |  |
| Inotrope requirement | 2 (2.4%) |  |  |  | 2 (4.7%) |  |  |
| Diastolic blood pressure |  | 84 (99%) |  | 41 (98%) |  | 43 (100%) | 0.623 |
| > 60 (mm Hg) | 67 (79.8%) |  | 34 (82.9%) |  | 33 (76.7%) |  |  |
| ≤ 60 (mm Hg) | 15 (17.9%) |  | 7 (17.1%) |  | 8 (18.6%) |  |  |
| Inotrope requirement | 2 (2.4%) |  |  |  | 2 (4.7%) |  |  |
| **Laboratory exams** |  |  |  |  |  |  |  |
| Hemoglobin (g/L) | 11.8 (10.8, 12.5) | 82 (96%) | 11.8 (11.2, 12.4) | 42 (100%) | 11.8 (10.6, 12.6) | 40 (93%) | 0.623 |
| Platelet count (109/L) | 201,000.0 (167,000.0, 243,000.0) | 81 (95%) | 211,000.0 (158,000.0, 238,000.0) | 41 (98%) | 199,000.0 (171,500.0, 251,750.0) | 40 (93%) | 0.737 |
| NL ratio | 4.9 (3.4, 7.1) | 82 (96%) | 4.4 (3.0, 7.0) | 42 (100%) | 5.1 (3.5, 7.2) | 40 (93%) | 0.424 |
| Lactate value | 1.1 (0.8, 1.5) | 34 (40%) | 1.1 (0.7, 1.6) | 16 (38%) | 1.1 (0.9, 1.3) | 18 (42%) | 0.691 |
| C reactive protein (mg/L) | 47.0 (19.0, 100.0) | 61 (72%) | 56.8 (21.0, 96.5) | 31 (74%) | 41.9 (18.6, 97.6) | 30 (70%) | 0.718 |
| Blood urea nitrogen (mg/dL) | 15.0 (11.2, 19.5) | 62 (73%) | 16.0 (13.0, 20.0) | 33 (79%) | 12.8 (10.3, 18.6) | 29 (67%) | 0.072 |
| Creatinine (mg/dL) | 0.6 (0.5, 0.7) | 72 (85%) | 0.6 (0.5, 0.8) | 36 (86%) | 0.6 (0.5, 0.7) | 36 (84%) | 0.243 |
| Sodium (mmol/L) | 136.0 (135.0, 138.0) | 52 (61%) | 136.0 (135.0, 137.0) | 29 (69%) | 137.0 (135.0, 139.5) | 23 (53%) | 0.258 |
| HCO3- | 18.8 (17.2, 20.0) | 42 (49%) | 19.7 (18.0, 20.0) | 23 (55%) | 17.4 (16.8, 19.9) | 19 (44%) | 0.017 |
| pH | 7.4 (7.4, 7.5) | 43 (51%) | 7.4 (7.4, 7.5) | 23 (55%) | 7.4 (7.4, 7.5) | 20 (47%) | 0.052 |
| Arterial pO2 | 85.3 (72.3, 105.6) | 43 (51%) | 97.0 (70.9, 111.0) | 23 (55%) | 81.6 (72.7, 90.2) | 20 (47%) | 0.268 |
| Arterial pCO2 | 29.0 (26.2, 30.9) | 43 (51%) | 29.0 (27.0, 30.2) | 23 (55%) | 29.5 (25.1, 33.1) | 20 (47%) | 0.826 |

*1Statistics presented: Median (IQR); n (%)*

*BMI: body mass index; COPD: chronic obstructive pulmonary disease; HCO3-: bicarbonate; NL ratio: neutrophils-to-lymphocytes ratio; pH: hydrogen potential;*

*pCO2: carbon dioxide partial pressure; pO2: oxygen partial pressure; SF ratio: SpO2/FiO2 ratio.*

​​
